# Supplementary material for: p38 Mitogen-activated protein kinase regulates chamber-specific perinatal growth in heart
Source: JCI journal article supplement (doi:10.1172/jci135859), 2020-06-23
Supplement: sd1 [file 1]

301 Moved Permanently

# Moved Permanently

The document has moved here.
